# Supplementary material for: Ground state structures of tantalum tetraboride and triboride: an ab initio study
Source: Royal Society of Chemistry journal article supplement (doi:10.1039/c6cp01649a), 2016-01-01
Supplement: c6cp01649a1.pdf [file c6cp01649a1.pdf]

## Supplementary Information

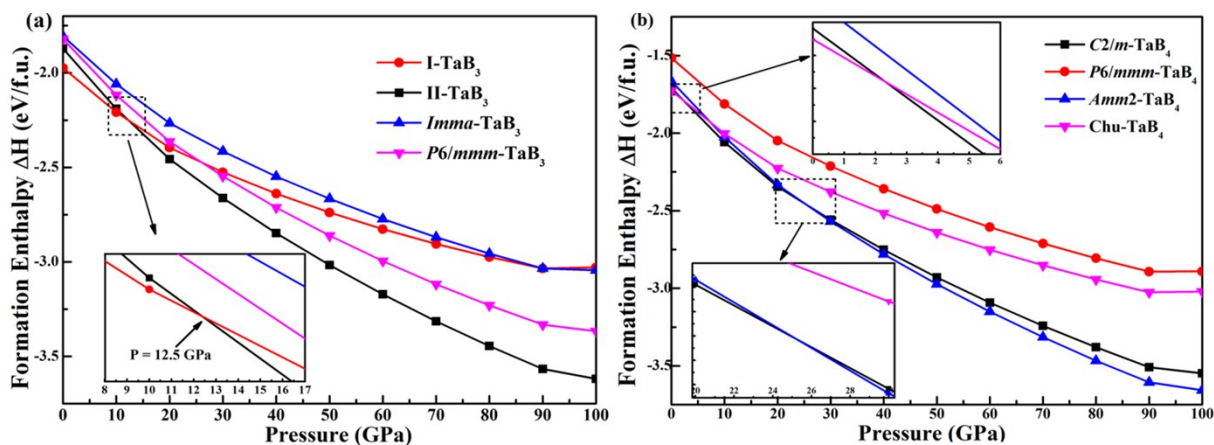

Fig. S1 The formation enthalpies of (a)  $TaB_3$  and (b)  $TaB_4$  relative to  $(Ta + B)$ .

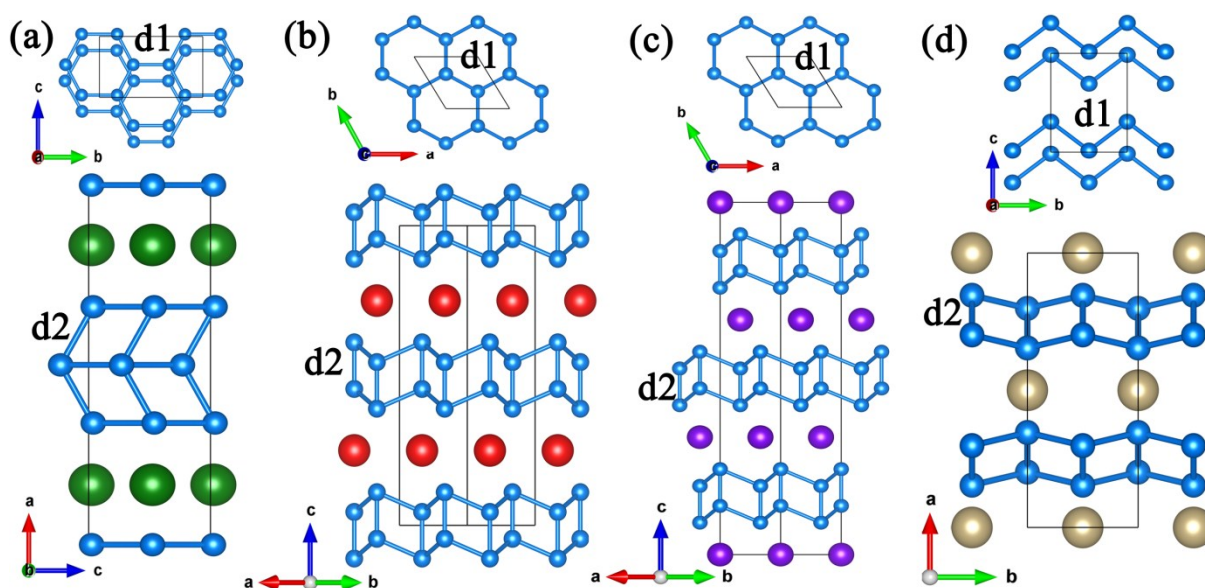

Fig. S2 Crystal structures for (a)  $Amm2-TaB_4$ , (b)  $WB_4$ , (c)  $ReB_4$ , and (d)  $OsB_4$ .

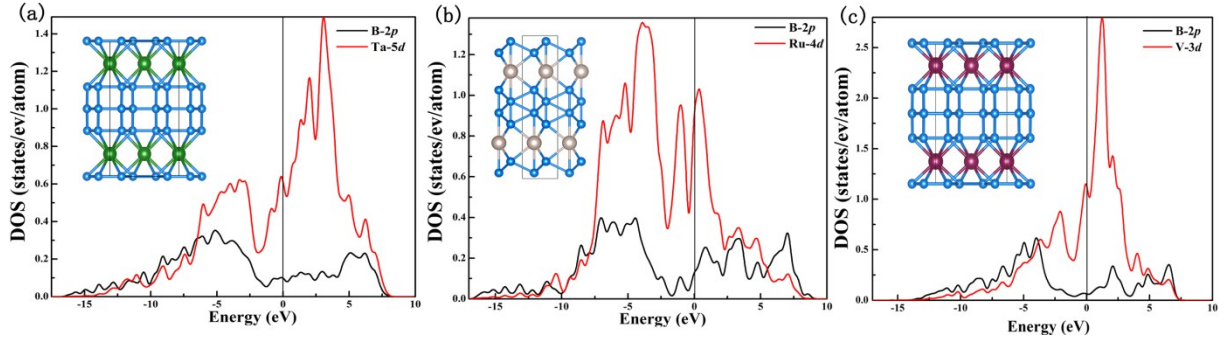

**Fig. S3** Partial density of states (PDOS) of two nearest-neighbour B atom and TM (TM = Ta, Ru, and V) atom for (a)  $Amm2-TaB_4$ , (b)  $P6_3/mmc-RuB_4$  and (c)  $Amm2-VB_4$ . Their crystal structures are shown in the inset.

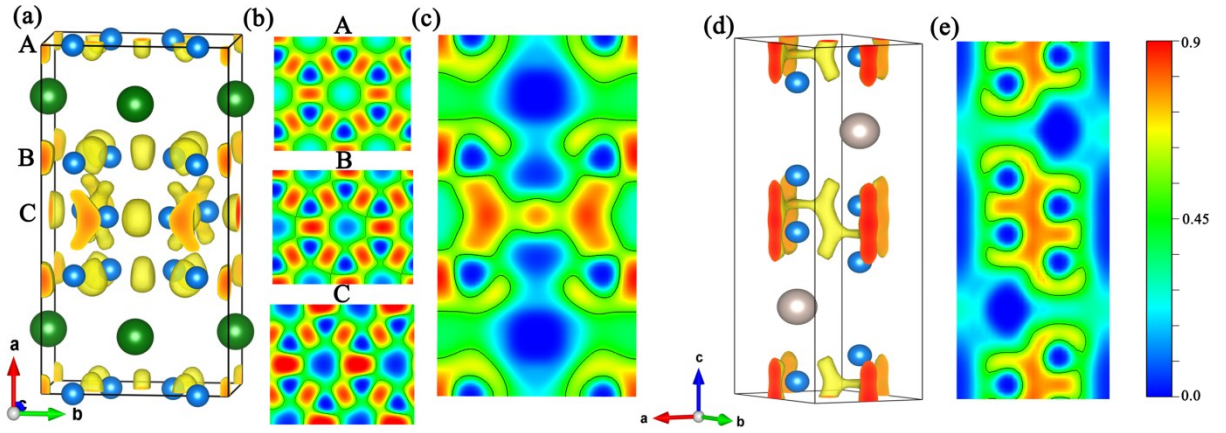

**Fig. S4** Contours of ELF = 0.75 for  $Amm2-TaB_4$  (a), three (100) planes for  $Amm2-TaB_4$  (b), (001) for  $Amm2-TaB_4$  (c), contours of ELF = 0.75 for  $P6_3/mmc-RuB_4$  (d), and (110) plane of  $P6_3/mmc-RuB_4$  (e).

**Table S1** Optimized equilibrium lattice parameters ( $\text{\AA}$  and  $^\circ$ ), elastic constants ( $C_{11}$ ,  $C_{22}$ ,  $C_{33}$ ) (GPa), bulk modulus  $B$  (GPa), shear modulus  $G$  (GPa), Young's modulus  $Y$  (GPa), Poisson's ratio  $\nu$ ,  $B/G$  ratio.

| <i>Str.</i>      |           | <i>a</i> | <i>b</i> | <i>c</i> | $\gamma$ | $C_{11}$ | $C_{22}$ | $C_{33}$ | $B$ | $G$ | $Y$ | $\nu$ | $B/G$ |
|------------------|-----------|----------|----------|----------|----------|----------|----------|----------|-----|-----|-----|-------|-------|
| $Amm2-TaB_4$     | This work | 9.961    | 5.285    | 3.111    |          | 546      | 615      | 642      | 295 | 219 | 526 | 0.20  | 1.35  |
| $P6_3/mmc-WB_4$  | Ref1      | 2.858    | 2.858    | 10.806   | 120      | 670      |          | 1174     | 380 | 263 | 640 | 0.22  | 1.44  |
| $R-3m-ReB_4$     | Ref2      | 2.938    | 2.938    | 16.325   | 120      | 563      |          | 943      | 306 | 221 | 535 | 0.20  | 1.38  |
| $Pmmn-OsB_4$     | Ref3      | 7.122    | 2.894    | 4.018    |          | 580      | 590      | 608      | 285 | 217 | 519 | 0.20  | 1.31  |
| $Amm2-VB_4$      | Ref4      | 9.292    | 5.187    | 3.062    |          | 625      | 657      | 544      | 264 | 222 | 520 | 0.17  | 1.19  |
| $P6_3/mmc-RuB_4$ | Ref5      | 2.943    | 2.943    | 10.590   | 120      | 442      |          | 830      | 281 | 175 | 435 | 0.24  | 1.61  |

1. Q. Li, D. Zhou, W. T. Zheng, Y. M. Ma, C. F. Chen, *Phys. Rev. Lett.* 2013, **110**, 136403.
2. B. Wang, D.Y. Wang, Y.X. Wang, *J. Alloys Compd.*, 2013, **573**, 20-26.

3. M. Zhang, H. Yan, G. Zhang, H.J. Wang, *J. Phys. Chem. C*, 2012, **116**, 4293-4297.
4. L. Wu, B. Wan, Y. Zhao, Y. Zhang, H. Liu, Y. Wang, J. Zhang, H. Gou, *J. Phys. Chem. C*. 2015, **119**, 21649–21657.
5. Y. Wang, T. Yao, L.-M. Wang, J. Yao, H. Li, J. Zhang, H. Gou, *Dalton Trans.* 2013, **42**, 7041–7050.

## Born-Huang criterion:

For an orthorhombic crystal:

$$C_{11} > 0, C_{22} > 0, C_{33} > 0, C_{44} > 0, C_{55} > 0, C_{66} > 0,$$

$$C_{11} + C_{22} + C_{33} + 2(C_{12} + C_{13} + C_{23}) > 0,$$

$$(C_{11} + C_{22} - 2C_{12}) > 0, (C_{11} + C_{33} - 2C_{13}) > 0,$$

$$(C_{22} + C_{33} - 2C_{23}) > 0,$$

For a monoclinic crystal:

$$C_{11} > 0, C_{22} > 0, C_{33} > 0, C_{44} > 0, C_{55} > 0, C_{66} > 0,$$

$$C_{11} + C_{22} + C_{33} + 2(C_{11} + C_{13} + C_{23}) > 0,$$

$$(C_{13}C_{55} - C_{35}^2) > 0, (C_{44}C_{66} - C_{46}^2) > 0, (C_{22} + C_{33} - 2C_{23}) > 0$$

$$[C_{22}(C_{33}C_{55} - C_{35}^2) + 2C_{23}C_{25}C_{35} - C_{23}^2C_{55} - C_{25}^2C_{33}] > 0,$$

$$g = C_{11}C_{22}C_{33} - C_{11}C_{23}^2 - C_{22}C_{13}^2 - C_{33}C_{12}^2 + 2C_{12}C_{13}C_{23},$$

$$\{2[C_{15}C_{25}(C_{33}C_{12} - C_{13}C_{23}) + C_{15}C_{35}(C_{22}C_{13} - C_{12}C_{23}) + C_{25}C_{35}(C_{11}C_{23} - C_{12}C_{13})] - [C_{15}^2(C_{22}C_{33} - C_{23}^2) +$$

$$C_{25}^2(C_{13}C_{33} - C_{13}^2) + C_{35}^2(C_{11}C_{22} - C_{12}^2)] + C_{55}g\} > 0$$
